# Supplementary material
Source: publisher figshare collection journal article supplement (https://karger.figshare.com/ndownloader/files/8252759)
Supplement: Supplementary file 1 [file 8252759]

**Suppl. table 1.** Correlations betweenselectedneuropsychological tests and physical behavior parameters

| **Test** | **Function** | Activity time | Activity intensity | Number of activity bouts | Mean activity bout length | Sedentary time | Sedentary intensity | Number of sedentary bouts | Mean sedentary bout length | Steps | Total movement intensity | Sedentary activity | Light activity | Moderate activity | Vigorous activity |
| --- | --- | --- | --- | --- | --- | --- | --- | --- | --- | --- | --- | --- | --- | --- | --- |
| MMSE | Global cognition | -.07 | .13 | .09 | -.17 | .09 | .09 | .04 | -.02 | .08 | .21 | -.20 | .11 | .19 | .15 |
| WMS-R: Digit Span forward# | Working memory | .16 | .17 | .16 | -.11 | -.10 | -.09 | .20 | -.19 | .26 | -.05 | .14 | -.20 | .18 | .20 |
| WMS-R: Digit Span backward# | Working memory | -.06 | .06 | .01 | -.10 | .07 | -.01 | .07 | -.05 | .05 | -.11 | .11 | -.07 | -.06 | -.02 |
| CERAD: Word-list recall# | Verbal memory | -.15 | **-.31*** | -.22 | .14 | .07 | .15 | -.18 | .14 | **-.30*** | -.05 | -.07 | .13 | -.17 | -.26 |
| CERAD: Semantic fluency# | Word generation | .13 | .01 | .16 | -.15 | -.09 | .20 | .22 | -.22 | .05 | .22 | -.25 | .22 | .24 | -.05 |
| CERAD: Phonematic fluency# | Word generation | -.26 | -.20 | -.20 | -.01 | **.30*** | .15 | -.25 | .26 | -.24 | .01 | -.12 | .20 | -.09 | -.14 |
| Trail Making Test: Part A# | Psychomotor speed | -.22 | .05 | -.10 | .01 | .27 | .15 | -.20 | .23 | -.11 | .12 | -.18 | .25 | -.08 | -.07 |
| Trail Making Test: Part B# | Psychomotor speed/Set shifting | .10 | .23 | .18 | -.19 | .00 | .02 | -.08 | .08 | .16 | .23 | -.14 | .08 | .29 | .09 |
| Trail Making Test: A/B# | Set shifting | .29 | .23 | **.30*** | -.28 | -.19 | -.14 | -.02 | -.03 | .26 | .09 | .07 | -.16 | **.31*** | .08 |
| CERAD: Praxis# | Visuo-construction | .20 | .27 | .23 | -.15 | -.13 | **-.30*** | **.32*** | -.29 | .25 | -.12 | .22 | -.27 | .20 | .13 |
| LPS 50+ 7: Mental Rotation# | Visuo-construction | .28 | .29 | **.31*** | -.19 | -.22 | -.08 | .09 | -.13 | **.32*** | .26 | -.17 | .02 | **.47**** | .29 |
| LPS 50+ 9: Spatial Sense# | Visuo-construction | .13 | .18 | .21 | **-.30*** | -.02 | .23 | .11 | -.10 | .20 | **.35*** | **-.36*** | **.30*** | **.31*** | .14 |
| Stroop: Word naming | Directed attention | .11 | .24 | .24 | **-.34*** | -.03 | .12 | .11 | -.13 | .16 | **.30*** | -.24 | .17 | **.34*** | .06 |
| Stroop: Color naming | Directed attention | .18 | .24 | .28 | **-.34*** | -.12 | .21 | .19 | -.23 | .16 | **.34*** | **-.33*** | .26 | **.34*** | .07 |
| Stroop: Interference condition | Inhibition | .02 | .17 | .15 | -.20 | .04 | .16 | .06 | -.07 | .06 | .24 | -.22 | .18 | .23 | .03 |

**correlation level of significance P < .01; *correlation level of significance P < .05; PANDA, Parkinson Neuropsychometric Dementia Assessment ; MMSE, Minimental State Examination; CERAD, Consortium for the Registry for Alzheimer's Disease (CERAD); BTA, Brief test of attention; WMS, Wechsler Memory Scale Revised; mWCST, Modified Card Sorting Test; LPS 50+, intelligence scale Leistungsprüfsystem for subjects between 50 and 90 years of age; #Data referred to standardized scores (e.g. z-scores or percentile rank scores, indicating the patient’s relative position in the norm group with a range between 0 and 100) of healthy German control subjects as published in the manuals. Data are corrected either for age or for age and education (CERAD, TMT, mWCST).
